# Supplementary material
Source: MDPI journal article supplement (https://www.mdpi.com/1422-0067/15/11/21476)
Supplement: s1 [file s1]

Archive with 3 entries (3 files):
- Tables S1-3,6-9.pdf
- Tables S4-5.xlsx
- ijms-62140-Supplementary Figures.pdf
