# Supplementary material for: Assessing the Accuracy of Quantitative Molecular Microbial Profiling
Source: MDPI journal article supplement (doi:10.3390/ijms151121476), 2014-11-21
Supplement: s1 [file s1 › Tables S1-3,6-9.pdf]

## Supplementary Information

**Table S1.** The composition of the metagenomic control material (MCM) ([15]).

| Bacteria               | ATCC No.    | Genome Size (MB) | Mol. Wt. (Da)        | ng per $\mu$ L (1 $\times$ ) | % Gram Weight | Genomic Copy Number per $\mu$ L (1 $\times$ ) | % Genomic Copy Number | 16S Copies | 16S Copies $\mu$ L (1 $\times$ ) | % 16S  | Relative Standard Deviation |
|------------------------|-------------|------------------|----------------------|------------------------------|---------------|-----------------------------------------------|-----------------------|------------|----------------------------------|--------|-----------------------------|
| MRSA                   | BAA-1556D   | 2.872769         | $1.8960 \times 10^9$ | $4.00 \times 10^{-3}$        | 0.80%         | $1.27 \times 10^3$                            | 0.75%                 | 5          | $6.35 \times 10^3$               | 0.78%  | 4.00%                       |
| MSSA                   | BAA-1718D-5 | 2.872915         | $1.8549 \times 10^9$ | $6.00 \times 10^{-2}$        | 12.00%        | $1.95 \times 10^4$                            | 11.52%                | 5          | $9.74 \times 10^4$               | 11.96% | 5.09%                       |
| <i>S. pneumoniae</i>   | 700669D-5   | 2.221315         | $1.4661 \times 10^9$ | $1.28 \times 10^{-1}$        | 25.60%        | $5.26 \times 10^4$                            | 31.09%                | 4          | $2.10 \times 10^5$               | 25.83% | 2.19%                       |
| <i>S. pyogenes</i>     | 700294D-5   | 1.852441         | $1.2226 \times 10^9$ | $2.00 \times 10^{-2}$        | 4.00%         | $9.85 \times 10^3$                            | 5.83%                 | 6          | $5.91 \times 10^4$               | 7.26%  | 3.49%                       |
| <i>S. agalactiae</i>   | BAA-611D-5  | 2.160267         | $1.4258 \times 10^9$ | $7.50 \times 10^{-3}$        | 1.50%         | $3.17 \times 10^3$                            | 1.87%                 | 7          | $2.22 \times 10^4$               | 2.72%  | 23.84%                      |
| <i>E. faecalis</i>     | 700802D-5   | 3.34194          | $2.2057 \times 10^9$ | $5.00 \times 10^{-3}$        | 1.00%         | $1.37 \times 10^3$                            | 0.81%                 | 4          | $5.46 \times 10^3$               | 0.67%  | 3.66%                       |
| <i>P. aeruginosa</i>   | 47085D-5    | 6.264404         | $4.1345 \times 10^9$ | $5.00 \times 10^{-3}$        | 1.00%         | $7.28 \times 10^2$                            | 0.43%                 | 4          | $2.91 \times 10^3$               | 0.36%  | 9.17%                       |
| <i>K. pneumoniae</i>   | 700721D-5   | 5.31512          | $3.5080 \times 10^9$ | $1.20 \times 10^{-1}$        | 24.00%        | $2.06 \times 10^4$                            | 12.18%                | 8          | $1.65 \times 10^5$               | 20.24% | 4.34%                       |
| <i>A. baumannii</i>    | 17978D-5    | 4.00075          | $2.6405 \times 10^9$ | $5.00 \times 10^{-4}$        | 0.10%         | $1.14 \times 10^2$                            | 0.07%                 | 5          | $5.70 \times 10^2$               | 0.07%  | 20.76%                      |
| <i>E. coli</i>         | 700928D-5   | 5.231428         | $3.4527 \times 10^9$ | $1.00 \times 10^{-2}$        | 2.00%         | $1.74 \times 10^3$                            | 1.03%                 | 7          | $1.22 \times 10^4$               | 1.50%  | 20.43%                      |
| <i>N. meningitidis</i> | 700532D-5   | 2.194961         | $1.4487 \times 10^9$ | $1.40 \times 10^{-1}$        | 28.00%        | $5.82 \times 10^4$                            | 34.42%                | 4          | $2.33 \times 10^5$               | 28.60% | 13.65%                      |

**Table S2.** The estimation of *P. aeruginosa* with and without dsDNA BR reagent using Qubit Fluorometer 2.0 with the Qubit dsDNA BR Assay Kit (Life Technologies).

[illegible]

**Table S3.** Fold change of the relative composition of the MCM according to the sequencing methods *versus* the dPCR analysis.

| Bacteria               | Fold Change |         |          |          | WGS  |
|------------------------|-------------|---------|----------|----------|------|
|                        | $\alpha$    | $\beta$ | $\gamma$ | $\delta$ |      |
| <i>A. baumannii</i>    | 0.79        | 0.41    | 1.36     | 2.03     | 1.94 |
| <i>P. aeruginosa</i>   | 0.51        | 0.77    | 1.16     | 1.14     | 1.58 |
| <i>E. faecalis</i>     | 2.41        | 0.54    | 1.00     | 1.02     | 2.04 |
| <i>E. coli</i>         | 0.61        | 1.34    | 0.68     | 0.80     | 1.29 |
| <i>S. agalactiae</i>   | 2.66        | 0.61    | 1.13     | 1.23     | 1.53 |
| <i>S. pyogenes</i>     | 2.66        | 0.58    | 0.85     | 0.90     | 1.75 |
| <i>K. pneumoniae</i>   | 0.54        | 1.34    | 0.79     | 0.79     | 1.06 |
| <i>S. aureus</i>       | 0.55        | 2.07    | 1.52     | 1.65     | 1.80 |
| <i>S. pneumoniae</i>   | 2.42        | 0.65    | 0.87     | 0.90     | 0.94 |
| <i>N. meningitidis</i> | 0.73        | 1.09    | 1.05     | 0.97     | 0.64 |

**Table S6.** The SILVA database (Quast *et al.*, 2013 [25]) contains mis-annotations which can lead to incorrect classification of reads, or shift the classification of reads to a higher taxonomic level when a lowest common ancestor analysis is used, as is the case for MEGAN (Huson *et al.*, 2011 [31]). The table illustrates a few such examples of mis-annotated sequences. MEGABLAST hits against the NCBI non-redundant Nucleotide database (accessed 16 May 2013) were used to verify the true identity of the sequences (Morgulis *et al.*, 2008 [30]). The taxonomic description of the BLAST hits are copied directly from the BLAST search results pages (accession numbers in brackets). The BLAST hits against the NCBI database clearly demonstrate that the SILVA taxonomic string for those sequences is incorrect. This is also verified by the phylogenetic tree shown in supplementary figure Y. In some cases (e.g., AB680060.1.1465 and JQ315432.1.1486) the SILVA species description is correct but the rest of the taxonomic string is incorrect. In other cases (e.g., HQ204284.1.1501) the whole taxonomic string is clearly in error.

| SILVA Accession Number | SILVA Taxonomic Classification                                                                                                    | Putative MCM Species         | Top 5 BLAST Hits against NCBI nr nt                                                                                                                                                                                                                                                                                                                                                                                                                             |
|------------------------|-----------------------------------------------------------------------------------------------------------------------------------|------------------------------|-----------------------------------------------------------------------------------------------------------------------------------------------------------------------------------------------------------------------------------------------------------------------------------------------------------------------------------------------------------------------------------------------------------------------------------------------------------------|
| CACX01001585.64.1585   | Bacteria; Proteobacteria;<br>Gammaproteobacteria;<br>Enterobacteriales;<br>Enterobacteriaceae;<br>Strongyloides ratti             | <i>Escherichia coli</i>      | Escherichia coli O145:H28 str. RM12581, complete genome (CP007136.1)<br>Escherichia coli O145:H28 str. RM12761, complete genome (CP007133.1)<br>Escherichia coli O145:H28 str. RM13514, complete genome (CP006027.1)<br>Escherichia coli O145:H28 str. RM13516, complete genome (CP006262.1)<br>Escherichia coli Xuzhou21, complete genome (CP001925.1)                                                                                                         |
| AB680060.1.1465        | Bacteria; Bacteroidetes;<br>Flavobacteria;<br>Flavobacteriales;<br>Flavobacteriaceae;<br>Flavobacterium;<br>Klebsiella pneumoniae | <i>Klebsiella pneumoniae</i> | Klebsiella sp. PSB-08 16S ribosomal RNA gene, partial sequence (KF761520.1)<br>Klebsiella pneumoniae gene for 16S rRNA, partial sequence, strain: NBRC 3318 (AB680060.1)<br>Uncultured Klebsiella sp. clone SL16 16S ribosomal RNA gene, partial sequence (HQ264076.1)<br>Uncultured Klebsiella sp. clone SL15 16S ribosomal RNA gene, partial sequence (HQ264075.1)<br>Klebsiella pneumoniae strain SY-1 16S ribosomal RNA gene, partial sequence (GU373625.1) |

Table S6. Cont.

| SILVA Accession Number | SILVA Taxonomic Classification                                                                                                        | Putative MCM Species         | Top 5 BLAST Hits against NCBI nr nt                                                                                                                                                                                                                                                                                                                                                                                                                     |
|------------------------|---------------------------------------------------------------------------------------------------------------------------------------|------------------------------|---------------------------------------------------------------------------------------------------------------------------------------------------------------------------------------------------------------------------------------------------------------------------------------------------------------------------------------------------------------------------------------------------------------------------------------------------------|
| HQ204286.1.1501        | Bacteria; Proteobacteria;<br>Betaproteobacteria;<br>Burkholderiales;<br>Alcaligenaceae;<br>Achromobacter;<br>bacterium NN169S         | <i>Klebsiella pneumoniae</i> | Klebsiella sp. NN169S 16S ribosomal RNA gene, partial sequence (HQ204286.2)<br>Uncultured Klebsiella sp. clone SL17 16S ribosomal RNA gene, partial sequence (HQ264077.1)<br>Uncultured Klebsiella sp. clone SL12 16S ribosomal RNA gene, partial sequence (HQ264072.1)<br>Klebsiella sp. D3S 16S ribosomal RNA gene, partial sequence (GU259534.1)<br>Klebsiella sp. enrichment culture clone M1 16S ribosomal RNA gene, partial sequence (JN036433.1) |
| HQ204295.1.1454        | Bacteria;<br>Actinobacteria;<br>Actinobacteria;<br>Corynebacteriales;<br>Nocardiaceae;<br>Rhodococcus;<br>bacterium YX118S            | <i>Klebsiella pneumoniae</i> | Klebsiella sp. YX118S 16S ribosomal RNA gene, partial sequence (HQ204295.2)<br>Klebsiella pneumoniae strain 2 16S ribosomal RNA gene, partial sequence (DQ444287.1)<br>Klebsiella pneumoniae strain SV1 16S ribosomal RNA gene, partial sequence (KF906836.1)<br>Klebsiella pneumoniae JM45, complete genome (CP006656.1)<br>Klebsiella pneumoniae strain PB12 16S ribosomal RNA gene, partial sequence (KF192506.1)                                    |
| HQ204284.1.1501        | Bacteria;<br>Proteobacteria;<br>Gammaproteobacteria;<br>Xanthomonadales;<br>Xanthomonadaceae;<br>Stenotrophomonas;<br>bacterium LC55S | <i>Klebsiella pneumoniae</i> | Klebsiella sp. LC55S 16S ribosomal RNA gene, partial sequence (HQ204284.2)<br>Uncultured Klebsiella sp. clone SL16 16S ribosomal RNA gene, partial sequence (HQ264076.1)<br>Uncultured Klebsiella sp. clone SL09 16S ribosomal RNA gene, partial sequence (HQ264069.1)<br>Klebsiella pneumoniae 342, complete genome (CP000964.1)<br>Klebsiella pneumoniae strain HUB-IV-004 16S ribosomal RNA gene, partial sequence (JN848784.1)                      |

Table S6. Cont.

| SILVA Accession Number | SILVA Taxonomic Classification                                                                                                   | Putative MCM Species                    | Top 5 BLAST Hits Against NCBI nr nt                                                                                                                                                                                                                                                                                                                                                                                              |
|------------------------|----------------------------------------------------------------------------------------------------------------------------------|-----------------------------------------|----------------------------------------------------------------------------------------------------------------------------------------------------------------------------------------------------------------------------------------------------------------------------------------------------------------------------------------------------------------------------------------------------------------------------------|
| JQ315432.1.1486        | Bacteria; Proteobacteria;<br>Gammaproteobacteria;<br>Pseudomonadales; Moraxellaceae;<br>Acinetobacter; Pseudomonas<br>aeruginosa | <i>Pseudomonas</i><br><i>aeruginosa</i> | Pseudomonas aeruginosa strain Y2P7 16S ribosomal RNA gene, partial sequence (EU221383.1)<br>Pseudomonas aeruginosa strain Y2P3 16S ribosomal RNA gene, partial sequence (EU221381.1)<br>Pseudomonas aeruginosa strain S20410 16S ribosomal RNA gene, partial sequence(KF956583.1)<br>Pseudomonas aeruginosa strain Y2P2 16S ribosomal RNA gene, partial sequence (EU221380.1)<br>Pseudomonas aeruginosa PA96 genome (CP007224.1) |

### Methods—SILVA mis-Annotations Tree

The *Klebsiella pneumoniae* (NC\_009648.1), *Escherichia coli* (NC\_004431.1) and *Pseudomonas aeruginosa* (NC\_002516.2) 16S rRNA sequences are from the MCM reference strains and were downloaded from the NCBI. The other sequences were extracted from SILVA and verified by MEGABLAST searches against the NCBI non-redundant Nucleotide database (accessed on 16 May 2013); these are SILVA accessions: AB453329.1.1236, AB010951.1.1478, AB010840.1.1318, AB046357.1.1493, AB008509.1.1467 and AB099655.1.1533. The phylogenetic tree was rooted by centrality and constructed using bioNJ (Gascuel, 1997 [37]) based on a Muscle alignment (Edgar, 2004 [38]) performed in Seaview (Galtier *et al.*, 1996 [39]).

**Table S7.** Primers and probes which were used for qPCR and dPCR in this study. Assays targeting *N. meningitidis* and *S. pneumoniae* were used to determine the stability of the MCM.

| Organism               | Target      | Accession No. | Primer/Probe                | Sequence (5'-3')                                                                  | Amplicon Size (bp) | Reference  |
|------------------------|-------------|---------------|-----------------------------|-----------------------------------------------------------------------------------|--------------------|------------|
| <i>N. meningitidis</i> | <i>ctrA</i> | AM4210808     | CtrA_F<br>CtrA_R<br>CtrA_HP | GCCGTTTGTGGCGATATTT<br>GCACGAATCACCGACACATT<br>[FAM] CGGTGGTCGGTAAACGCCTGG [BHQ1] | 150                | This study |

Table S7. Cont.

| Organism             | Target       | Accession No. | Primer/Probe                   | Sequence (5'-3')                                                                                  | Amplicon Size (bp) | Reference                  |
|----------------------|--------------|---------------|--------------------------------|---------------------------------------------------------------------------------------------------|--------------------|----------------------------|
| <i>S. pneumoniae</i> | <i>lytA</i>  | HG531769      | LytA-F<br>LytA-R<br>LytA_HP    | ACGCAATCTAGCAGATGAAGC<br>TGTTTGGTTGGTTATTCGTGC<br>[FAM] TTTGCCGAAAACGCTTGATACAGGG [BHQ1]          | 101                | Harris <i>et al.</i> [21]  |
| <i>E. coli</i>       | <i>uidA</i>  | AE014075      | uidA_F<br>uidA_R<br>uidA_HP    | GCCCGCTTCGAAACCAAT<br>TCGCATTACCCTTACGCTGAA<br>[FAM] TCCATGTTCATCTGCCCAGTCGAGC [BHQ1]             | 120                | This study                 |
| <i>S. aureus</i>     | <i>coA</i>   | AB436985      | coA_F<br>coA_R<br>coA_HP       | GTAGATTGGGCAATTACATTTTGGAGG<br>CGCATCTGCTTTGTTATCCCATGTA<br>[FAM] TAGGCGCATTAGCAGTTGCATC [BHQ1]   | 117                | This study                 |
| <i>S. pyogenes</i>   | <i>csrR</i>  | JX414161      | csrR_F<br>csrR_R<br>csrR_HP    | TGGATGTGGTTGCAGGTTTAGAC<br>CGGGCAAGTAGTTCTTCAATGG<br>[FAM] CGGTGCAGACGACTATATTGTTAAACC [BHQ1]     | 79                 | This study                 |
| <i>P. aeruginosa</i> | <i>regA</i>  | EU342000      | regA_F<br>regA_R<br>regA_MGB   | TGCTGGTGGCACAGGACAT<br>TTGTTGGTGCAGTTCCTCATTC<br>[FAM] CAGATGCTTTGCCTCAA [BHQ1]                   | 65                 | Lee <i>et al.</i> [40]     |
| <i>K. pneumoniae</i> | <i>Khe</i>   | AF293352      | Khe_F<br>Khe_R<br>Khe_HP       | GATGAAACGACCTGATTGCATTC<br>CCGGGCTGTCGGGATAAG<br>[FAM] CGCGAACTGGAAGGGCCCG [BHQ1]                 | 77                 | Hartman <i>et al.</i> [41] |
| <i>E. faecalis</i>   | <i>groES</i> | AF335185      | groES_F<br>groES_R<br>groES_HP | TTACTGTGTCACCAATTTTACTTCCA<br>AACCACAAACAGGTGAAGTTATCG<br>[FAM] TGCCATTTTCAAGCACACGACCTTCA [BHQ1] | 96                 | This study                 |
| <i>S. agalactiae</i> | <i>sip</i>   | HQ878436      | sip_F<br>sip_R<br>sip_HP       | ATCCTGAGACAACACTGACA<br>TTGCTGGTGTCTTCTATTTTCA<br>[FAM] ATCAGAAGAGTCATACTGCCACTTC [BHQ1]          | 78                 | This study                 |

**Table S7. Cont.**

| Organism            | Target      | Accession No. | Primer/Probe                                   | Sequence (5'-3')                                                                                                       | Amplicon Size (bp) | Reference  |
|---------------------|-------------|---------------|------------------------------------------------|------------------------------------------------------------------------------------------------------------------------|--------------------|------------|
| <i>A. baumannii</i> | <i>ompA</i> | KJ363323      | ompA_1F(G)<br>ompA_2F(A)<br>ompA_R<br>ompA_MGB | CATGGAACCTTCGTGTGTTCTTTG<br>CATGGAACCTTCGTGTATTCTTTG<br>GCAGTAGCGTTAGGGTATTCAGATAAT<br>[FAM] AAATCAAACATCAAAGACC [MGB] | 111                | This study |

**Table S8.** Digital MIQE checklist for authors, reviewers and editors.

| Item to Check                                                        | Importance | Checklist | Comments/Where?                           |
|----------------------------------------------------------------------|------------|-----------|-------------------------------------------|
| <b>Experimental Design</b>                                           |            |           |                                           |
| Definition of experimental and control Groups                        | E          | N/A       |                                           |
| Number within each group.                                            | E          | N/A       |                                           |
| Assay carried out by core lab or investigators' lab?                 | D          | YES       | At both core and investigators laboratory |
| Power analysis                                                       | D          | N/A       |                                           |
| <b>Sample</b>                                                        |            |           |                                           |
| Description                                                          | E          | N/A       |                                           |
| Volume or mass of sample processed                                   | E          | N/A       |                                           |
| Microdissection or macrodissection                                   | E          | N/A       |                                           |
| Processing procedure                                                 | E          | N/A       |                                           |
| If frozen, how and how quickly?                                      | E          | N/A       |                                           |
| If fixed, with what, how quickly?                                    | E          | N/A       |                                           |
| Sample storage conditions and duration (especially for FFPE samples) | E          | N/A       |                                           |

Table S8. *Cont.*

| Item to Check                                                                 | Importance | Checklist | Comments/Where?                                                                                                                         |
|-------------------------------------------------------------------------------|------------|-----------|-----------------------------------------------------------------------------------------------------------------------------------------|
| <b>Nucleic Acid Extraction</b>                                                |            |           |                                                                                                                                         |
| Quantification—instrument/method                                              | E          | YES       | Experimental Section                                                                                                                    |
| Storage conditions: Temperature, concentration, duration, buffer              | E          | YES       | Figure S1                                                                                                                               |
| DNA or RNA quantification                                                     | E          | YES       | DNA                                                                                                                                     |
| Quality/integrity—instrument/method; e.g., RIN/RQI and trace or 3':5'         | E          | YES       | Figure S2                                                                                                                               |
| Template structural information                                               | E          | N/A       |                                                                                                                                         |
| Template modification (digestion, sonication, pre-amplification <i>etc.</i> ) | E          | N/A       |                                                                                                                                         |
| Template treatment (initial heating or chemical denaturation)                 | E          | YES       | Experimental Section                                                                                                                    |
| Inhibition dilution or spike                                                  | E          | YES       | Each assay was performed on dilutions of the template. All assays displayed a linear relationship between amplification and copy number |
| DNA contamination assessment of RNA sample                                    | E          | N/A       |                                                                                                                                         |
| Details of DNase treatment where performed                                    | E          | N/A       |                                                                                                                                         |
| Manufacturer of reagents used and catalogue number                            | D          | N/A       |                                                                                                                                         |
| Storage of nucleic acid: temperature, concentration, duration, buffer         | E          | YES       | Samples were stored in TE Buffer at $-80^{\circ}\text{C}$ for up to 12 months                                                           |

Table S8. *Cont.*

| Item to Check                                                 | Importance | Checklist | Comments/Where?                                                          |
|---------------------------------------------------------------|------------|-----------|--------------------------------------------------------------------------|
| <b>Reverse Transcription (If Necessary)</b>                   |            |           |                                                                          |
| cDNA priming method + concentration                           | E          | N/A       |                                                                          |
| One or two step protocol                                      | E          | N/A       |                                                                          |
| Amount of RNA used per reaction                               | E          | N/A       |                                                                          |
| Detailed reaction components and conditions                   | E          | N/A       |                                                                          |
| RT efficiency                                                 | D          | N/A       |                                                                          |
| Estimated copies measured with and without addition of RT *   | D          | N/A       |                                                                          |
| Manufacturer of reagents used and catalogue number            | D          | N/A       |                                                                          |
| Reaction volume (for two step reverse transcription reaction) | D          | N/A       |                                                                          |
| Storage of cDNA: temperature, concentration, duration, buffer | D          | N/A       |                                                                          |
| <b>dPCR Target Information</b>                                |            |           |                                                                          |
| Sequence accession number                                     | E          | YES       | Table S6                                                                 |
| Location of amplicon                                          | D          | YES       | Available on request                                                     |
| Amplicon length                                               | E          | YES       | Table S6                                                                 |
| <i>In silico</i> specificity screen (BLAST, <i>etc.</i> )     | E          | YES       | This was performed using BLAST, all assays were 100 % specific to target |
| Pseudogenes, retropseudogenes or other homologs?              | D          | YES       | N/A                                                                      |
| Sequence alignment                                            | D          | YES       | Available on request                                                     |

Table S8. *Cont.*

| Item to Check                                             | Importance | Checklist | Comments/Where?                                                                                                               |
|-----------------------------------------------------------|------------|-----------|-------------------------------------------------------------------------------------------------------------------------------|
| Secondary structure analysis of amplicon and GC content   | D          | YES       | Analysis was performed using Primer Express 3.0. Primers were selected according to the criteria of the program               |
| Location of each primer by exon or intron (if applicable) | E          | N/A       |                                                                                                                               |
| Where appropriate, which splice variants are targeted?    | E          | N/A       |                                                                                                                               |
| <b>dPCR Oligonucleotides</b>                              |            |           |                                                                                                                               |
| Primer sequences and/or amplicon context sequence **      | E          | YES       | Table S6                                                                                                                      |
| RTPrimerDB Identification Number                          | D          | N/A       |                                                                                                                               |
| Probe sequences **                                        | D          | YES       | Table S6                                                                                                                      |
| Location and identity of any modifications                | E          | YES       | Table S6                                                                                                                      |
| Manufacturer of oligonucleotides                          | D          | YES       | Primers and dual labelled probes were manufactured by SIGMA and Eurofins. MGB probes were manufactured by Applied Biosystems. |
| Purification method                                       | D          | YES       | HPLC                                                                                                                          |
| <b>dPCR Protocol</b>                                      |            |           |                                                                                                                               |
| Complete reaction conditions                              | E          | YES       | Experimental Section                                                                                                          |
| Reaction volume and amount of RNA/cDNA/DNA                | E          | YES       | Experimental Section                                                                                                          |

Table S8. *Cont.*

| Item to Check                                                        | Importance | Checklist | Comments/Where?                                                                                                                 |
|----------------------------------------------------------------------|------------|-----------|---------------------------------------------------------------------------------------------------------------------------------|
| Primer, (probe), Mg++ and dNTP concentrations                        | E          | YES       | Experimental Section;<br>Manufacturer's<br>proprietary                                                                          |
| Polymerase identity and concentration                                | E          | YES       | Experimental Section;<br>concentration is<br>Manufacturer's<br>proprietary                                                      |
| Buffer/kit Catalogue No and manufacturer                             | E          | YES       | Experimental Section;<br>Biotium Fast Probe<br>Master Mix with Rox<br>(31016-1), ABI Gene<br>Expression Master Mix<br>(4369016) |
| Exact chemical constitution of the buffer                            | D          | NO        | Manufacturers'<br>proprietary                                                                                                   |
| Additives (SYBR Green I, DMSO, <i>etc.</i> )                         | E          | N/A       |                                                                                                                                 |
| Plates/tubes Catalogue No and manufacturer                           | D          | YES       | Fluidigm (100-6152)                                                                                                             |
| Complete thermocycling parameters                                    | E          | YES       | Experimental Section                                                                                                            |
| Reaction setup                                                       | D          | YES       | Experimental Section                                                                                                            |
| Gravimetric or volumetric dilutions<br>(manual/robotic)              | D          | YES       | Volumetric dilutions<br>(manual)                                                                                                |
| Total PCR reaction volume prepared                                   | D          | YES       | Experimental Section                                                                                                            |
| Partition number                                                     | E          | YES       | Experimental Section                                                                                                            |
| Individual partition volume                                          | E          | YES       | Experimental Section                                                                                                            |
| Total volume of the partitions measured<br>(effective reaction size) | E          | YES       | Experimental Section                                                                                                            |
| Partition volume variance/standard deviation                         | D          | N/A       |                                                                                                                                 |

Table S8. *Cont.*

| Item to Check                                                                  | Importance | Checklist | Comments/Where?                  |
|--------------------------------------------------------------------------------|------------|-----------|----------------------------------|
| Comprehensive details and appropriate use of controls                          | E          | YES       | Experimental Section and Results |
| Manufacturer of dPCR instrument                                                | E          | YES       | Experimental Section             |
| <b>dPCR Validation</b>                                                         |            |           |                                  |
| Optimisation data for the assay                                                | D          | YES       | Available on request             |
| Specificity (when measuring rare mutations, pathogen sequences <i>etc.</i> )   | E          | YES       | This was checked using qPCR      |
| Limit of detection of calibration control                                      | D          | N/A       |                                  |
| If multiplexing, comparison with singleplex assays                             | E          | N/A       |                                  |
| <b>Data Analysis</b>                                                           |            |           |                                  |
| Average copies per partition ( $\lambda$ or equivalent )                       | E          | YES       | $\lambda$ (average) 1.07         |
| dPCR analysis program (source, version)                                        | E          | YES       | Experimental Section             |
| Outlier identification and disposition                                         | E          | N/A       |                                  |
| Results of NTCs                                                                | E          | YES       | All NTCs gave negative results   |
| Examples of positive(s) and negative experimental results as supplemental data | E          | YES       | Supplementary Table              |
| Where appropriate, justification of number and choice of reference genes       | E          | YES       |                                  |
| Where appropriate, description of normalisation method                         | E          | YES       | Experimental Section             |
| Number and concordance of biological replicates                                | D          | N/A       |                                  |
| Number and stage (RT or qPCR) of technical replicates                          | E          | YES       | Experimental Section             |
| Repeatability (intra-assay variation)                                          | E          | YES       | Figure 7                         |
| Reproducibility (inter-assay/user/lab <i>etc.</i> variation )                  | D          | N/A       |                                  |
| Experimental variance or confidence interval ***                               | E          | YES       | Results                          |

**Table S8. Cont.**

| Item to Check                         | Importance | Checklist | Comments/Where?      |
|---------------------------------------|------------|-----------|----------------------|
| Statistical methods used for analysis | E          | YES       | Experimental Section |
| Data submission using RDML            | D          | N/A       |                      |

All essential information (E) must be submitted with the manuscript. Desirable information (D) should be submitted if possible. \* Assessing the absence of DNA using a no RT assay (or where RT has been inactivated) is essential when first extracting RNA. Once the sample has been validated as DNA-free, inclusion of a no-RT control is desirable, but no longer essential; \*\* Disclosure of the primer and probe sequence is highly desirable and strongly encouraged. However, since not all commercial pre-designed assay vendors provide this information when it is not available assay context sequences must be submitted (48); \*\*\* When single dPCR experiments are performed, the variation due to counting error alone should be calculated from the binomial (or suitable equivalent) distribution.

**Table S9. Minimum information about any (x) sequence (MIxS).**

| Structured Comment Name | Amplicon Sequencing          | Whole Genome Sequencing      |
|-------------------------|------------------------------|------------------------------|
| submitted_to_insd       | N/A                          | N/A                          |
| investigation_type      | bacteria                     | bacteria                     |
| project_name            | metagenomic control material | metagenomic control material |
| experimental_factor     |                              |                              |
| lat_lon                 | N/A                          | N/A                          |
| depth                   | N/A                          | N/A                          |
| alt_elev                | N/A                          | N/A                          |
| geo_loc_name            | N/A                          | N/A                          |
| collection_date         | N/A                          | N/A                          |
| env_biome               | N/A                          | N/A                          |
| env_feature             | N/A                          | N/A                          |
| env_material            | N/A                          | N/A                          |
| env_package             | N/A                          | N/A                          |
| subspecf_gen_lin        |                              |                              |
| ploidy                  | haploid                      | haploid                      |
| num_replicons           |                              |                              |

Table S9. *Cont.*

| Structured Comment Name | Amplicon Sequencing                                  | Whole Genome Sequencing       |
|-------------------------|------------------------------------------------------|-------------------------------|
| extrachrom_elements     |                                                      |                               |
| estimated_size          | 3.5455395 Mbp                                        | 3.5455395 Mbp                 |
| ref_biomaterial         | doi:10.1007/s00769-012-0941-z                        | doi:10.1007/s00769-012-0941-z |
| source_mat_id           |                                                      |                               |
| pathogenicity           | bacteria                                             | bacteria                      |
| biotic_relationship     | N/A                                                  | N/A                           |
| specific_host           | N/A                                                  | N/A                           |
| host_spec_range         | N/A                                                  | N/A                           |
| health_disease_stat     | N/A                                                  | N/A                           |
| trophic_level           | N/A                                                  | N/A                           |
| propagation             | N/A                                                  | N/A                           |
| encoded_traits          | N/A                                                  | N/A                           |
| rel_to_oxygen           | N/A                                                  | N/A                           |
| isol_growth_condt       | N/A                                                  | N/A                           |
| samp_collect_device     | N/A                                                  | N/A                           |
| samp_mat_process        | N/A                                                  | N/A                           |
| samp_size               | N/A                                                  | N/A                           |
| nucl_acid_ext           | ATCC proprietary information                         | ATCC proprietary information  |
| nucl_acid_amp           | Lib-L method March 2012 version<br>(Roche GS Junior) | N/A                           |
| lib_size                |                                                      |                               |
| lib_reads_seqd          | 123528 (mean)                                        | 123528 (mean)                 |
| lib_const_meth          | paired-end                                           | paired-end                    |
| lib_vector              | N/A                                                  | N/A                           |
| lib_screen              | N/A                                                  | N/A                           |
| target_gene             | 16S rRNA                                             | N/A                           |
| target_subfragment      | V1, 2, 4, 5 and 6                                    | N/A                           |

**Table S9. Cont.**

| Structured Comment Name | Amplicon Sequencing                                                                                                                                                           | Whole Genome Sequencing |
|-------------------------|-------------------------------------------------------------------------------------------------------------------------------------------------------------------------------|-------------------------|
| pcr_primers             | In figure                                                                                                                                                                     | N/A                     |
| mid                     | N/A                                                                                                                                                                           |                         |
| adapters                | FA'(CCATCTCATCCCTGCGTG<br>TCTCCGACTCAG)-MIDs-515F<br>and<br>FB'(CCTATCCCCTGTGTGCCT<br>TGGCAGTCTCAG)-909R                                                                      |                         |
| pcr_cond                | initial denaturation: 94degC_3min;<br>annealing: 94degC_15sec;<br>elongation: 61degC_45sec;<br>final elongation: 72degC_60sec;<br>total cycles 35;<br>extenstion: 72degC_8min |                         |
| seq_meth                | Pyrosequencing                                                                                                                                                                | Illumina                |
| seq_quality_check       | Manually edited                                                                                                                                                               | Manually edited         |
| chimera_check           | ChimeraSlayer                                                                                                                                                                 | ChimeraSlayer           |
| assembly                |                                                                                                                                                                               |                         |
| assembly_name           |                                                                                                                                                                               |                         |
| finishing_strategy      |                                                                                                                                                                               |                         |
| annot_source            |                                                                                                                                                                               |                         |
| url                     |                                                                                                                                                                               |                         |
| sop                     |                                                                                                                                                                               |                         |
