# Supplementary material for: Assessing the Accuracy of Quantitative Molecular Microbial Profiling
Source: MDPI journal article supplement (doi:10.3390/ijms151121476), 2014-11-21
Supplement: s1 [file s1 › Tables S4-5.xlsx]

## Sheet: Table S4
Table S4. Summary of the WGS subsampling results using a bootstrap approach. MCM1, MCM2 and MCM3 refer to the three replicate experiments of the MCM material.
1,000 subsamples were generated of the sizes of 500, 1000, 2,500, 5,000, 10,000 and 30,000.
MEAN	500			1000			2500			5000			10000			20000			30000
Species	MCM1 500	MCM2 500	MCM3 500	MCM1 1000	MCM2 1000	MCM3 1000	MCM1 2500	MCM2 2500	MCM3 2500	MCM1 5000	MCM2 5000	MCM3 5000	MCM1 10000	MCM2 10000	MCM3 10000	MCM1 20000	MCM2 20000	MCM3 20000	MCM1 30000	MCM2 30000	MCM3 30000	MCM-1 original	MCM-2 original	MCM-3 original	Qubit
Neisseria meningitidis	22.559	22.4715	21.9398	22.5584	22.5538	22.0089	22.4965	22.5386	21.9612	22.5129	22.5678	21.9919	22.5419	22.5527	21.9885	22.518	22.5572	22.0136	22.5274	22.5695	22.0062	22.5358	22.5683	22.0096	34.4169
Streptococcus pneumoniae	35.9733	36.5834	36.1471	35.9554	36.6686	36.203	35.9065	36.5351	36.2181	35.963	36.5132	36.1412	35.9487	36.5232	36.2067	35.9633	36.5001	36.2159	35.96	36.509	36.2162	35.954	36.5144	36.2031	31.0935
Staphylococcus aureus	18.7119	18.2578	19.348	18.8018	18.182	19.2577	18.739	18.2588	19.3841	18.7771	18.2668	19.3906	18.7874	18.2998	19.3669	18.784	18.2976	19.3566	18.7789	18.2779	19.3766	18.7823	18.2734	19.3695	12.2709
Klebsiella pneumoniae	7.14812	7.33186	7.13543	7.0647	7.35094	7.11974	7.07719	7.28721	7.06846	7.09678	7.29544	7.08538	7.07274	7.28909	7.08657	7.07149	7.29615	7.07484	7.06552	7.3	7.07622	7.07048	7.29545	7.07516	12.1826
Streptococcus pyogenes	10.8427	10.6463	10.6733	10.7876	10.5876	10.6781	10.9295	10.6855	10.629	10.8334	10.6696	10.6302	10.8214	10.6361	10.6088	10.8391	10.6603	10.5867	10.8405	10.6534	10.582	10.8289	10.6612	10.6001	5.82581
Streptococcus agalactiae	2.66717	2.62937	2.67138	2.74419	2.60836	2.69808	2.73684	2.60696	2.66277	2.72907	2.60174	2.69292	2.72465	2.61642	2.67784	2.72855	2.60634	2.68604	2.73114	2.60729	2.67992	2.73263	2.61013	2.67821	1.87337
Escherichia coli	0.908742	0.951806	0.922006	0.88964	0.898107	0.881998	0.904307	0.923071	0.893656	0.897098	0.926163	0.893461	0.902176	0.920543	0.894821	0.902769	0.921367	0.89509	0.90477	0.921088	0.893629	0.903724	0.921155	0.895263	1.03145
Enterococcus faecalis	0.99129	0.930015	0.960272	0.989403	0.943788	0.946773	0.990464	0.953408	0.965453	0.980536	0.949488	0.965226	0.990352	0.955621	0.966345	0.988157	0.956956	0.968793	0.987278	0.958093	0.966906	0.987221	0.952276	0.967402	0.807313
Pseudomonas aeruginosa	0.044129	0.0453679	0.0418594	0.0695427	0.0788629	0.0693267	0.103625	0.0984797	0.102029	0.104126	0.106867	0.103984	0.10602	0.106365	0.100081	0.103822	0.106716	0.101869	0.103334	0.106136	0.101658	0.104232	0.106777	0.102077	0.430686
Acinetobacter baumannii	0.153601	0.152582	0.16085	0.139351	0.127975	0.136514	0.115995	0.112798	0.115244	0.106009	0.102873	0.105175	0.104647	0.100114	0.103521	0.100766	0.0972925	0.100531	0.101169	0.097611	0.100682	0.10078	0.096877	0.099678	0.0674371
SD	MCM1							MCM2							MCM3
Species	MCM1 500	MCM1 1000	MCM1 2500	MCM1 5000	MCM1 10000	MCM1 20000	MCM1 30000	MCM2 500	MCM2 1000	MCM2 2500	MCM2 5000	MCM2 10000	MCM2 20000	MCM2 30000	MCM3 500	MCM3 1000	MCM3 2500	MCM3 5000	MCM3 10000	MCM3 20000	MCM3 30000
Neisseria meningitidis	2.80032	1.89828	1.23294	0.870319	0.616372	0.426117	0.352394	2.84293	1.8839	1.23068	0.857919	0.60463	0.426934	0.35375	2.64938	1.87432	1.2078	0.832565	0.608068	0.436745	0.329818
Streptococcus pneumoniae	3.16125	2.28477	1.44899	0.988335	0.669178	0.498124	0.404248	3.24483	2.29244	1.42158	0.982567	0.703445	0.50603	0.408837	3.13918	2.29318	1.43283	0.989939	0.692608	0.489335	0.410919
Staphylococcus aureus	2.32221	1.6565	1.07581	0.749547	0.522998	0.372202	0.318742	2.41421	1.64567	1.01435	0.72503	0.514553	0.367652	0.294573	2.44557	1.64979	1.07748	0.736402	0.539422	0.379173	0.310043
Klebsiella pneumoniae	1.17673	0.801359	0.516564	0.359929	0.269785	0.180176	0.145365	1.17129	0.792135	0.527202	0.358122	0.247402	0.175367	0.147739	1.18474	0.779664	0.495391	0.384893	0.244777	0.170083	0.14199
Streptococcus pyogenes	2.38331	1.57628	1.05891	0.706077	0.483367	0.347479	0.292287	2.43541	1.5748	0.991695	0.702786	0.509563	0.355988	0.302866	2.30099	1.58655	1.01289	0.71346	0.496935	0.350645	0.300833
Streptococcus agalactiae	1.11297	0.758448	0.494851	0.337215	0.250714	0.174453	0.140591	1.07776	0.768305	0.479703	0.358119	0.242865	0.168483	0.14091	1.10454	0.803218	0.478817	0.347115	0.241177	0.175654	0.1333
Escherichia coli	0.424705	0.294575	0.185279	0.132693	0.0903073	0.066227	0.0527621	0.413046	0.300874	0.190393	0.132782	0.0917857	0.0653436	0.0517593	0.41433	0.296032	0.186554	0.124187	0.0918453	0.0643365	0.052669
Enterococcus faecalis	0.564959	0.399601	0.249387	0.177732	0.123378	0.0885506	0.0686432	0.52314	0.384009	0.2475	0.16521	0.123842	0.0853087	0.071825	0.539038	0.409847	0.240937	0.170187	0.119873	0.0842108	0.0680612
Pseudomonas aeruginosa	0.14618	0.117043	0.063593	0.0421348	0.0271901	0.0189453	0.0158266	0.148198	0.122943	0.0634968	0.0427842	0.0275532	0.0189392	0.0162071	0.144341	0.117076	0.0664558	0.0420798	0.0261671	0.0190747	0.015857
Acinetobacter baumannii	0.243528	0.150473	0.0780415	0.0529399	0.0354699	0.0255611	0.0204577	0.245084	0.146808	0.0753058	0.0498538	0.0362054	0.0243784	0.01991	0.252685	0.142226	0.0746438	0.0516345	0.0363467	0.0248476	0.0207513

## Sheet: Table S5
Table S5a. The percentage of reads that passed the threshold settings for the amplicon sequencing and WGS approaches.
Dataset	Pre-filter	Post-Filter	% Passed
Alpha - replicate 1	66256	27223	41.088
Alpha - replicate 2	46248	26095	56.424
Alpha - replicate 3	31595	17621	55.771
Beta - replicate 1	88561	42981	48.533
Beta - replicate 2	52007	27846	53.543
Beta - replicate 3	37095	24362	65.675
Dataset	Pre-filter	Post-Filter	% Passed
Gamma - replicate 1	34433	14417	41.87
Gamma - replicate 2	13994	4286	30.627
Gamma - replicate 3	30696	8362	27.241
Delta - replicate 1	49211	15764	32.033
Delta - replicate 2	24535	7955	32.423
Delta - replicate 3	23435	8318	35.494
Dataset	Read Type	Pre-filter	Post-filter	% Passed
MCM1	Paired	37178948	22983592	61.82
	Unpaired		7316841	19.68
	Total	37178948	30300433	81.5
MCM2	Paired	18714063	11654195	62.28
	Unpaired		3569499	19.07
	Total	18714063	15223694	81.35
MCM3	Paired	33873047	20807359	61.43
	Unpaired		6532325	19.28
	Total	33873047	27339684	80.71
Table S5b. Summary of SILVA genus level results.
MEGAN min support 5
Assay12
Genus	Strategy α_Rep1		Strategy β_Rep1		Strategy α_Rep2		Strategy β_Rep2		Strategy α_Rep3		Strategy β_Rep3
	Vs MCM	Vs Silva	Vs MCM	Vs Silva	Vs MCM	Vs Silva	Vs MCM	Vs Silva	Vs MCM	Vs Silva	Vs MCM	Vs Silva
Neisseria	49.4165	65.0852	32.7419	39.0377	34.0214	44.4746	31.8027	38.989	37.8499	48.1149	33.5239	41.5429
Streptococcus	9.45457	11.8953	25.8571	28.8515	25.172	29.7863	28.5994	33.0152	18.3334	22.0287	29.3126	34.1388
Staphylococcus	17.3955	22.9114	26.7914	31.9784	19.5056	25.5113	22.7459	27.9109	23.3864	29.7499	19.5417	24.2148
Klebsiella	22.8759		13.5314		19.596		15.5557		19.218		16.4489
Escherichia	0.656153		0.75266		1.26717	0.0492793	0.973671		0.895555		0.939104
Enterococcus	0.0820192	0.0294681	0.25246	0.109862	0.210809	0.0862388	0.241977	0.0494875	0.167462	0.0370542	0.187821	0.0776116
Pseudomonas	0.0596503		0.054267		0.155211		0.0518523		0.0910117		0.0250428
Acinetobacter	0.0596503	0.0785816	0.0188755	0.0225358	0.0718141	0.0923987	0.0288068	0.0353482	0.0582475	0.0694766	0.020869	0.0258705
Assay456
Genus	Strategy δ_Rep1		Strategy γ_Rep1		Strategy δ_Rep2		Strategy γ_Rep2		Strategy δ_Rep3		Strategy γ_Rep3
	Vs MCM	Vs Silva	Vs MCM	Vs Silva	Vs MCM	Vs Silva	Vs MCM	Vs Silva	Vs MCM	Vs Silva	Vs MCM	Vs Silva
Neisseria	36.6225	47.4744	29.9394	37.8635	33.9053	42.8377	32.1824	41.4559	32.8472	42.3662	33.7973	42.1895
Streptococcus	39.4838	52.0296	40.2471	54.7671	44.8181	56.4033	43.7269	57.5096	40.1659	53.4836	44.9449	56.9013
Staphylococcus	14.5592	0.111347	20.0567	6.89919	17.5978	0.603348	17.7912	0.842912	19.2668	3.69953	16.8986	0.618294
Klebsiella	8.52093		8.64742		3.19835		5.45598		6.77014		3.62395
Escherichia	0.448839		0.676686		0.343171		0.553506		0.588708		0.393908
Enterococcus	0.245459	0.222695	0.243922	0.196807	0.137268	0.155703	0.158144		0.147177	0.169014	0.249475	0.181851
Pseudomonas	0.0701311		0.0865528						0.107038
Acinetobacter	0.0490918	0.0809799	0.10229	0.142139			0.131787		0.107038	0.150235	0.0919118	0.109111
Enterobacter		0.0809799
Fusobacterium				0.0656024				0.191571
Bacillus				0.0656024						0.131455
